# Supplementary material for: Solvent-shielding allows the self-assembly of supramolecular 1D barium vanadate chains
Source: Royal Society of Chemistry journal article supplement (doi:10.1039/c3ce40536b), 2013-01-01
Supplement: c3ce40536b.pdf [file c3ce40536b.pdf]

## Electronic Supplementary information (ESI)

For

### Solvent-shielding allows the self-assembly of supramolecular 1D barium vanadate chains

Katharina Kastner<sup>a</sup> and Carsten Streb<sup>a,b,\*</sup>

<sup>a</sup>Department Chemistry and Pharmacy, Institute of Inorganic Chemistry II, Friedrich-Alexander-University Erlangen-Nuremberg, Egerlandstr. 1, 91058 Erlangen, Germany

<sup>b</sup>Ulm University, Institute of Inorganic Chemistry I, Albert-Einstein-Allee 11, 89081 Ulm, Germany

\*Email: [carsten.streb@chemie.uni-erlangen.de](mailto:carsten.streb@chemie.uni-erlangen.de); carsten.streb@uni-ulm.de

## 1. Instrumentation

**X-ray diffraction:** Single-crystal X-ray diffraction studies were performed on a Nonius Kappa CCD Single-crystal X-ray diffractometer equipped with a graphite monochromator using MoK $\alpha$  radiation (wavelength  $\lambda(\text{Mo-K}\alpha) = 0.71073\text{\AA}$ ).

**UV-Vis spectroscopy:** UV-Vis spectroscopy was performed on a Shimadzu UV-2401PC spectrophotometer, Varian Cary 50 spectrophotometer or Varian Cary 5G spectrophotometer equipped with a Peltier thermostat. All systems were used with standard cuvettes ( $d = 10.0\text{ mm}$ ).

**Diffuse reflectance UV-Vis spectra** were recorded on a Jasco V650 spectrophotometer. Samples were referenced against BaSO<sub>4</sub>.

**Thermogravimetric analysis (TGA):** TGA was performed on a Setaram Setsys CS Evo, 30-1000°C @ 10K/min, 200 mL/min He, Graphite crucible 0.5 mL.

**Atomic absorption spectroscopy:** Atomic absorption spectroscopy analysis was performed on a Perkin Elmer 5100 PC spectrometer.

**FT-IR spectroscopy:** FT-IR spectroscopy was performed on a Shimadzu - FT-IR Prestige-21 spectrometer including a Golden Gate-ATR-unit. Signals are given as wavenumbers in  $\text{cm}^{-1}$  using the following abbreviations: vs = very strong, s = strong, m = medium, w = weak and b = broad.

**Elemental analysis:** Elemental analysis was performed on a Euro Vector Euro EA 3000 Elemental Analyzer.

**General remarks:** All chemicals were purchased from Sigma Aldrich, ACROS or ABCR and were of reagent grade. The chemicals were used without further purification unless stated otherwise.

**Mass spectrometry (MS):**

MS measurements were performed on a UHR-TOF Bruker Daltonik (Bremen, Germany) maXis, an ESI-ToF MS capable of resolution of at least 40,000 FWHM. Detection was in negative-ion mode and the source voltage was 4 kV. The flow rates were 500  $\mu\text{L}/\text{hour}$ . The drying gas ( $\text{N}_2$ ), to aid solvent removal, was held at 180  $^\circ\text{C}$ . The machine was calibrated prior to every experiment via direct infusion of the Agilent ESI-TOF low concentration tuning mixture, which provided an m/z range of singly charged peaks up to 2700 Da.

CSI-MS measurements were performed on a UHR-TOF Bruker Daltonik (Bremen, Germany) maXis, which was coupled to a Bruker cryospray unit, an ESI-ToF MS capable of resolution of at least 40,000 FWHM. Detection was in negative-ion mode and the source voltage was 4.5 kV (for compound 1) and 2.5 kV (for compound 2), respectively. The flow rates were 300  $\mu\text{L}/\text{hour}$ . The drying gas ( $\text{N}_2$ ), to aid solvent removal, was held at -35  $^\circ\text{C}$  and the spray gas was held at -40  $^\circ\text{C}$ . The machine was calibrated prior to every experiment via direct infusion of the Agilent ESI-TOF low concentration tuning mixture, which provided an m/z range of singly charged peaks up to 2700 Da in both ion modes.

## 2. Synthetic section

### 2.1 Synthesis of $(^n\text{BuN})_2[\text{H}_4\text{V}_{10}\text{O}_{28}]$

$\text{V}_2\text{O}_5$  (16 g, 86.87 mmol) were suspended in water (100 mL) and the pH was adjusted to 12.5 with a saturated aqueous solution of NaOH. Then the pH was slowly decreased by dropwise addition of HCl (6 M) to pH 3.0. The reaction mixture turned from slightly orange to reddish orange. The reaction mixture was added dropwise to a solution of  $(^n\text{Bu}_4\text{N})\text{Br}$  (17 g, 52.74 mmol) in water (100 mL). The orange precipitate was filtered off, washed with water, ethanol and  $\text{Et}_2\text{O}$  and dried.

Yield: 22.5 g (15.56 mmol, 88 % of crude product based on V).

Elemental analysis for  $\text{C}_{32}\text{H}_{76}\text{N}_2\text{V}_{10}\text{O}_{28}$  in wt.-% (calcd.): C 26.45 (26.57), H 5.43 (5.30), N 1.89 (1.94).

### 2.2 Synthesis of $\{[\text{Ba}(\text{nmp})_4(\text{H}_2\text{O})]_2[\text{H}_4\text{V}_{10}\text{O}_{28}]\}\{[\text{Ba}(\text{nmp})_3(\text{H}_2\text{O})_2][\text{H}_3\text{V}_{10}\text{O}_{28}]\}_2 \times 2\text{H}_2\text{O} \times 10 \text{ NMP}\}_\infty$ (Compound 1)

$\text{BaBr}_2 \times 2\text{H}_2\text{O}$  (157 mg, 0.474 mmol, 1.7 eq) and 400 mg  $(^n\text{Bu}_4\text{N})_2[\text{H}_4\text{V}_{10}\text{O}_{28}]$  (400 mg, 0.277 mmol, 1 eq) were suspended in 10 mL *N*-Methyl-2-pyrrolidone and 500  $\mu\text{L}$  water. The reaction mixture was heated up to 70 °C until it turned into a clear, orange solution. Diffusion crystallisation with acetone as diffusion solvent resulted in yellow plate crystals. Yield: 450 mg (0.076  $\mu\text{mol}$ , 82 % of crude product based on V).

Elemental analysis for  $\text{Ba}_4\text{C}_{120}\text{H}_{242}\text{N}_{24}\text{V}_{30}\text{O}_{116}$  in wt.-% (calcd.): C 24.78 (24.20), H 3.74 (4.09), N 5.40 (5.65), Ba 8.44 (9.22), V: 24.94 (25.66).

Characteristic IR bands (in  $\text{cm}^{-1}$ ): 3151 (b), 2957(w), 2929 (w), 2875 (w), 1628 (s), 1508 (m), 1476 (w), 1456 (w), 1447/1444 (w), 1425 (w), 1405 (m), 1309 (m), 1260 (m), 1178 (w), 1120 (m), 985/972/960/945 (s), 827 (s), 752 (m), 720 (m), 659 (w).

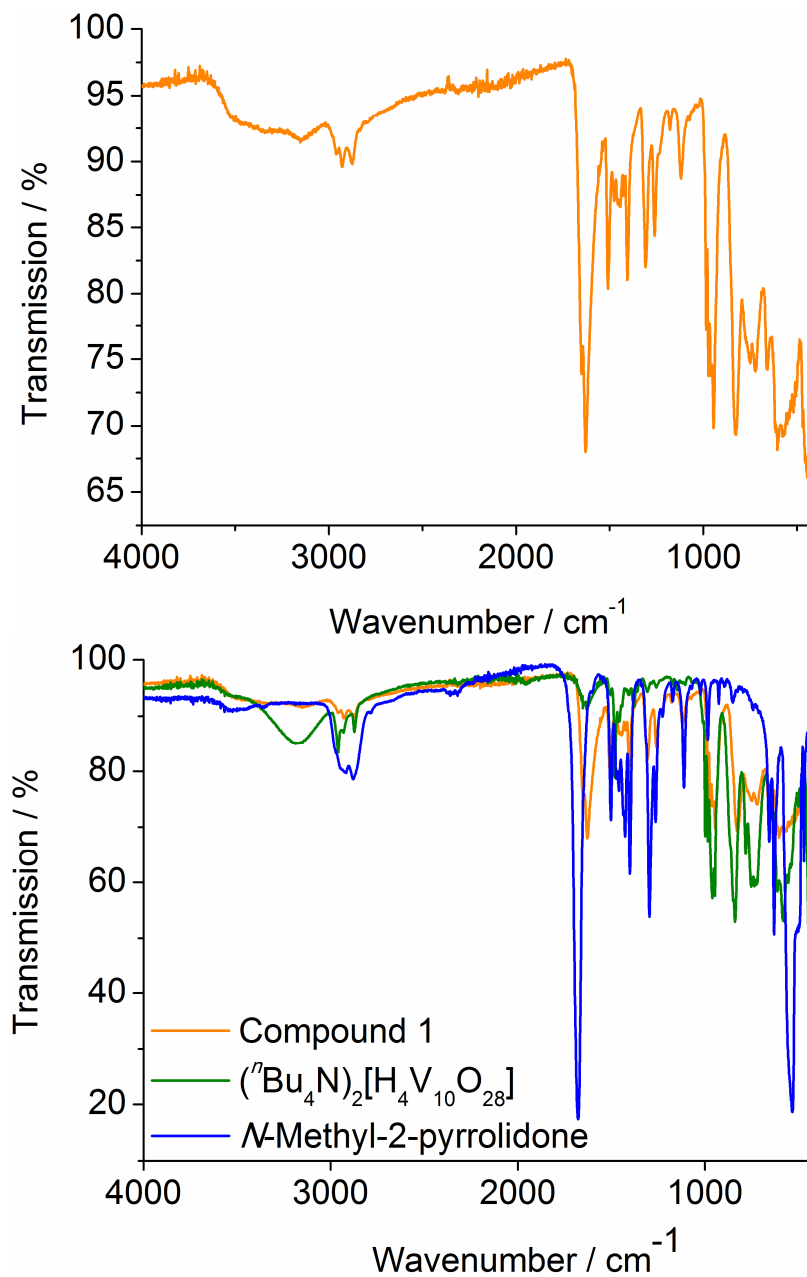

**Figure S 1 Top:** FT-IR spectrum of  $\{[\text{Ba}(\text{nmp})_4(\text{H}_2\text{O})_2][\text{H}_4\text{V}_{10}\text{O}_{28}]\} \{[\text{Ba}(\text{nmp})_3(\text{H}_2\text{O})_2][\text{H}_2\text{V}_{10}\text{O}_{28}]\}_2 \times 2 \text{H}_2\text{O} \times 10 \text{NMP}\}_\infty$  showing the characteristic V-O vibrational modes in the fingerprint region  $< 1000 \text{ cm}^{-1}$  and solvent molecule based stretching modes. **Bottom:** Comparison of FT-IR spectra of  $[\text{Ba}_2(\text{nmp})_8(\text{H}_2\text{O})_2(\text{H}_3\text{V}_{10}\text{O}_{28})_2]$  ( $[\text{Ba}_2(\text{nmp})_6(\text{H}_2\text{O})_4(\text{H}_4\text{V}_{10}\text{O}_{28})]$ ), the precursor  $(\text{nBu}_4\text{N})_2[\text{H}_4\text{V}_{10}\text{O}_{28}]$  and the solvent *N*-Methyl-2-pyrrolidone.

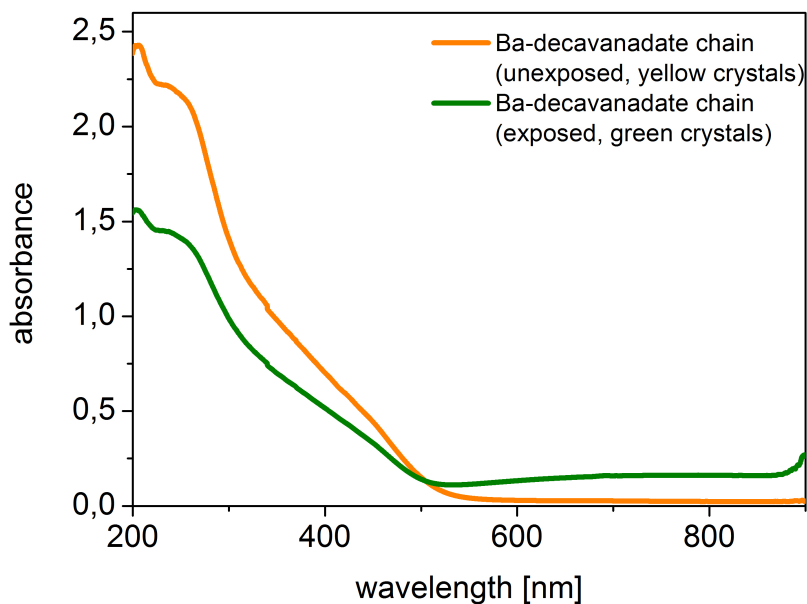

**Figure S 2** UV-Vis spectra of compound **1** (orange) and compound **1** after irradiation with visible light for 24 h (green). The spectral changes indicate a solid-state redox reaction, most likely between the vanadium centres (reduction) and the NMP ligands (oxidation).

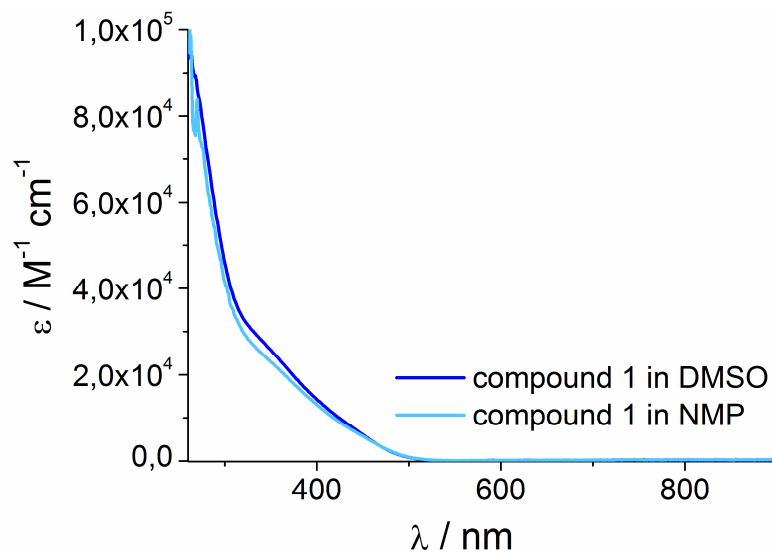

**Figure S 3** UV-Vis spectra of compound **1** dissolved in DMSO (dark blue) and NMP (bright blue).

### 2.3 Synthesis of $\{[(\text{Ba}(\text{dmf})_4)_2[\text{H}_2\text{V}_{10}\text{O}_{28}]]_\infty\}$ (Compound 2)

Compound 1 (100 mg, 0.017 mmol) was dissolved in 8 mL *N-N*-dimethyl formamide (DMF) and was stirred at room temperature for 4 h. Diffusion crystallisation with acetone as diffusion solvent resulted in yellow blocks.

Yield: 45 mg (0.025  $\mu\text{mol}$ , 49 % of crude product based on V).

Elemental analysis for  $\text{Ba}_2\text{C}_{24}\text{H}_{58}\text{N}_8\text{V}_{10}\text{O}_{36}$  in wt.-% (calcd.): C 15.29 (15.85), H 3.10 (3.21), N 6.11 (6.16), Ba 14.86 (15.10), V: 28.23 (28.00).

Characteristic IR bands (in  $\text{cm}^{-1}$ ): 3528 (b), 3372 (b), 2929 (w), 2880 (w), 2810 (w), 2160 (w), 2031 (w), 1672 (m), 1641 (s), 1597 (m), 1497 (m), 1435 (m), 1414 (m), 1387 (m), 1250 (w), 1152 (w), 1101 (m), 1067 (w), 970/953/943 (s), 826 (s), 746 (m), 664 (m).

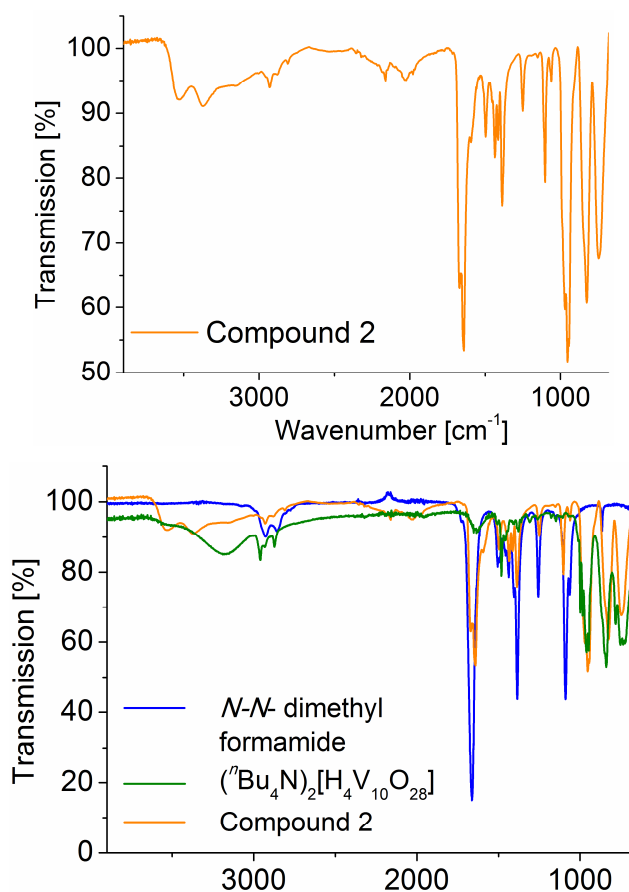

**Figure S 4 Top:** IR spectrum of  $\{[(\text{Ba}(\text{dmf})_4)_2[\text{H}_2\text{V}_{10}\text{O}_{28}]]_\infty\}$  (Compound 2) showing the characteristic V-O vibrational modes in the fingerprint region  $< 1000 \text{ cm}^{-1}$  and solvent molecule based stretching modes. **Bottom:** Comparison of FT-IR spectra of  $\{[(\text{Ba}(\text{dmf})_4)_2[\text{H}_2\text{V}_{10}\text{O}_{28}]]_\infty\}$ , the precursor  $(n\text{Bu}_4\text{N})_2[\text{H}_4\text{V}_{10}\text{O}_{28}]$  and the solvent *N,N*-dimethyl formamide.

### 3. Crystallographic information

Single-Crystal Structure Determination: Suitable single crystals of the respective compound were grown and mounted onto the end of a thin glass fiber using Fomblin oil. X-ray diffraction intensity data were measured at 150 K on a Nonius Kappa CCD diffractometer [ $\lambda(\text{Mo-K}\alpha) = 0.71073 \text{ \AA}$ ] equipped with a graphite monochromator. Structure solution and refinement was carried out using the SHELX-97 package<sup>S1</sup> via WinGX.<sup>S2</sup> Corrections for incident and diffracted beam absorption effects were applied using empirical methods.<sup>S3</sup> Structures were solved by a combination of direct methods and difference Fourier syntheses and refined against  $F^2$  by the full-matrix least-squares technique. Crystal data, data collection parameters and refinement statistics are listed in Table S1. These data can be obtained free of charge via [www.ccdc.cam.ac.uk/conts/retrieving.html](http://www.ccdc.cam.ac.uk/conts/retrieving.html) or from the Cambridge Crystallographic Data Center, 12, Union Road, Cambridge CB2 1EZ; fax:(+44) 1223-336-033; or [deposit@ccdc.cam.ac.uk](mailto:deposit@ccdc.cam.ac.uk). CCDC reference numbers 928366 (1) and 928367 (2).

**Table S 1** Crystallographic data for 1 and 2

|                                             | Compound 1                                                                     | Compound 2                                                                  |
|---------------------------------------------|--------------------------------------------------------------------------------|-----------------------------------------------------------------------------|
| Formula                                     | $\text{C}_{55}\text{H}_{92}\text{Ba}_2\text{N}_{11}\text{O}_{57}\text{V}_{15}$ | $\text{C}_{24}\text{H}_{54}\text{Ba}_2\text{N}_8\text{O}_{36}\text{V}_{10}$ |
| $M_r$ [g mol <sup>-1</sup> ]                | 2854.65                                                                        | 1814.83                                                                     |
| Crystal system                              | Triclinic                                                                      | Triclinic                                                                   |
| Space group                                 | <i>P</i> -1                                                                    | <i>P</i> -1                                                                 |
| <i>a</i> [Å]                                | 12.240(2)                                                                      | 11.340(2)                                                                   |
| <i>b</i> [Å]                                | 13.285(3)                                                                      | 11.638(2)                                                                   |
| <i>c</i> [Å]                                | 33.139(7)                                                                      | 12.492(3)                                                                   |
| $\alpha$ [°]                                | 98.09(3)                                                                       | 104.74(3)                                                                   |
| $\beta$ [°]                                 | 91.58(3)                                                                       | 103.04(3)                                                                   |
| $\gamma$ [°]                                | 106.32(3)                                                                      | 107.93(3)                                                                   |
| $\rho_{\text{calcd}}$ [g cm <sup>-3</sup> ] | 1.856                                                                          | 2.105                                                                       |
| <i>V</i> [Å <sup>3</sup> ]                  | 5107(2)                                                                        | 1431.8(5)                                                                   |

|                                               |                |                |
|-----------------------------------------------|----------------|----------------|
| Z                                             | 2              | 1              |
| $\mu(\text{Mo}_{K\alpha}) [\mu\text{m}^{-1}]$ | 2.156          | 2.999          |
| T [K]                                         | 150            | 150            |
| F(000)                                        | 2817           | 884            |
| min, max $\theta$ [°]                         | 5.82, 26.50    | 5.80, 26.37    |
| no reffs measured                             | 116359         | 34583          |
| no reffs unique                               | 14582          | 4323           |
| no parameters                                 | 1343           | 436            |
| Goof                                          | 1.054          | 1.030          |
| R1 (I > 2 $\sigma$ (I))                       | 0.0570         | 0.0503         |
| wR2 (all data)                                | 0.1411         | 0.1261         |
| max/min resd /e $\text{\AA}^{-3}$             | 0.988 / -1.586 | 0.988 / -1.157 |

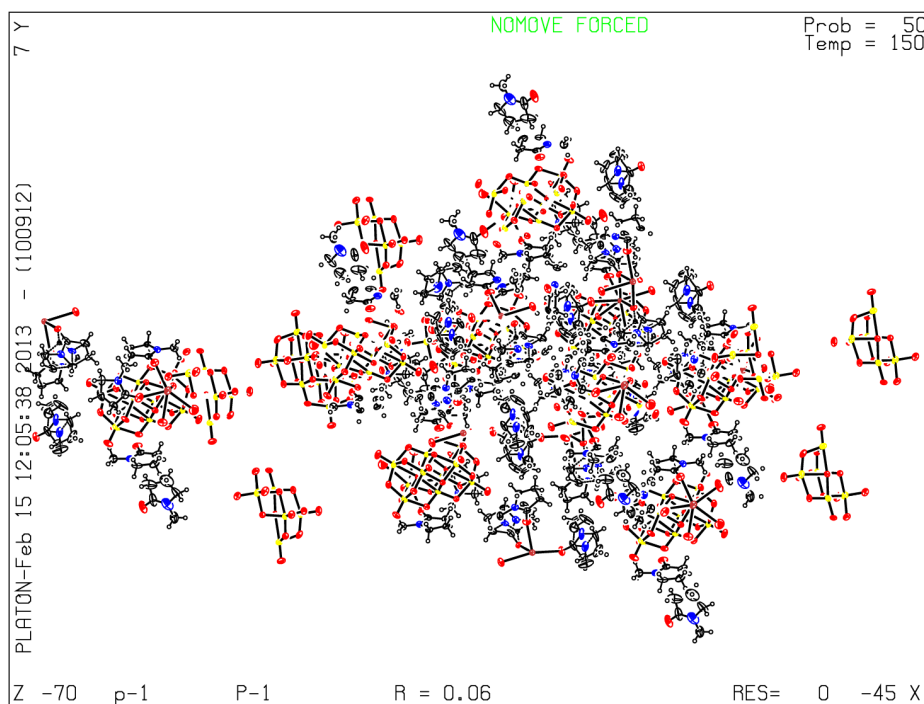

**Figure S 4:** ORTEP-plot of compound 1, probability ellipsoids given at 50 %. Several NMP ligands were disordered over two positions. The structure was refined to satisfactory R values.



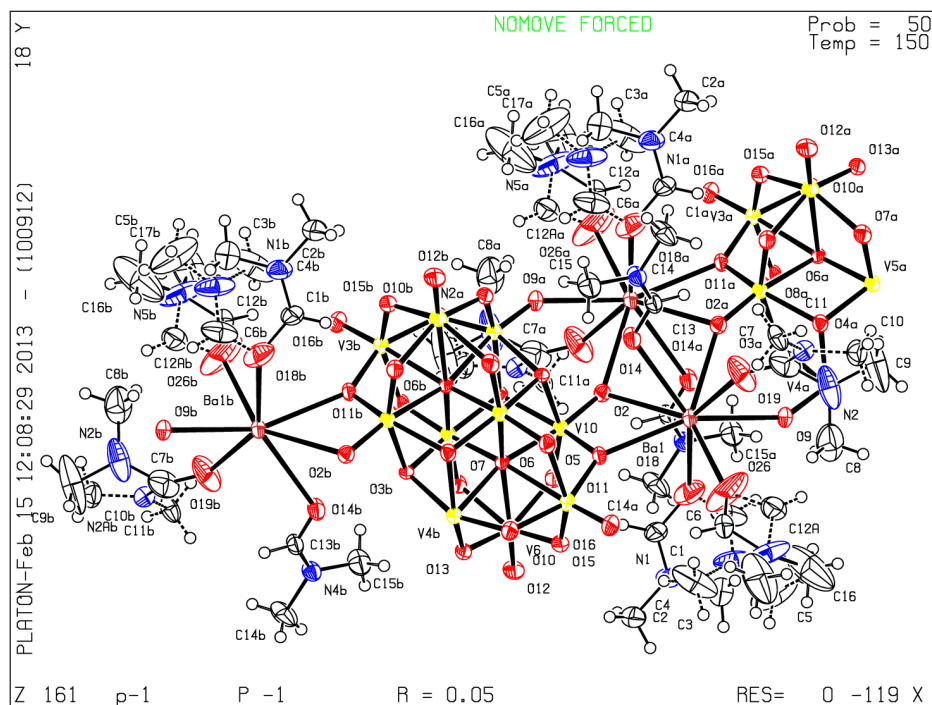

**Figure S 5:** ORTEP-plot of compound **2**, probability ellipsoids given at 50 %. Several DMF ligands were modeled using a disorder over two positions. This allowed refinement of the structure to satisfactory R values.

#### BVS-Calculations for compound 1:

Characterization of the protonation of the oxygen atoms of the vanadate clusters using bond valence sum calculations of compound **1** indicated that the oxygen atoms O30 (BVS 1.334) and O35 (BVS 1.344) are mono-protonated. Both oxygen ligands feature two symmetry-related positions in the decavanadate cluster, giving an overall fourfold cluster protonation  $[\text{H}_4\text{V}_{10}\text{O}_{28}]^{2-}$ .

Bond valence sum calculations also indicate that the oxygen atoms O4 (BVS- 1.247), O15 (BVS 1.186) and O22 (BVS 1.135) located on the second decavanadate cluster are mono-protonated, giving  $[\text{H}_3\text{V}_{10}\text{O}_{28}]^{3-}$ .

#### BVS-Calculations for compound 2:

Characterization of the protonation of the oxygen atoms of the vanadate clusters using bond valence sum calculations of compound **2** indicated that oxygen atom O3 (BVS

1.281) is mono-protonated. O3 features two symmetry-related positions, giving an overall di-protonated cluster species  $[\text{H}_2\text{V}_{10}\text{O}_{28}]^{4-}$ .

All oxygen atoms identified by BVS as being protonated also feature short intermolecular contacts to hydrogen-bond acceptors (NMP,  $\text{H}_2\text{O}$ ), thus further substantiating the protonation assignment.

## 4. Mass spectrometry

4.1 ESI-MS measurements were performed on  $\{[\text{Ba}(\text{nmp})_4(\text{H}_2\text{O})]_2[\text{H}_4\text{V}_{10}\text{O}_{28}]\}$   $\{[\text{Ba}(\text{nmp})_3(\text{H}_2\text{O})_2][\text{H}_2\text{V}_{10}\text{O}_{28}]\}_2 \times 2\text{H}_2\text{O} \times 10 \text{ NMP}\}_\infty$  (ca.  $1 \times 10^{-4}$  M in DMF/MeCN (1:4, v:v)) in negative (-ve) ion mode.

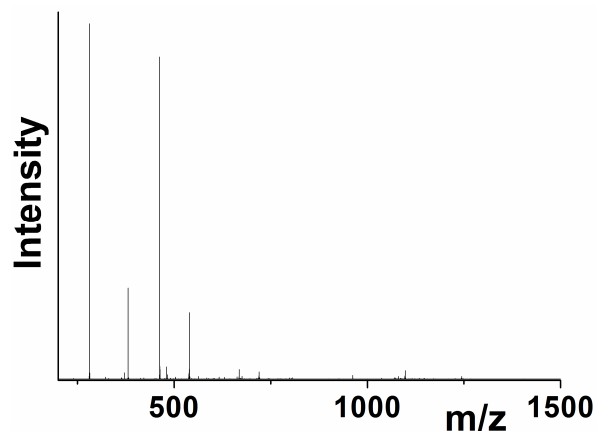

**Figure S 5** Negative mode high resolution ESI mass spectrum of compound **1** ca.  $1 \times 10^{-5}$  M in DMF/MeCN (1:4, v:v).

**Table S 2** Peak assignments for ESI-MS Spectrum of compound **1** in DMF/MeCN (1:4, v:v).

| recorded m/z | calculated m/z | peak assignment                                                                          |
|--------------|----------------|------------------------------------------------------------------------------------------|
| 280.78       | 280.790        | $[\text{V}_6\text{O}_{16}]^{2-}$                                                         |
| 380.72       | 380.73         | $\text{H}[\text{V}_4\text{O}_{11}]^{1- \text{S}4}$                                       |
| 462.64       | 462.65         | $[\text{V}_{10}\text{O}_{26}]^{2- \text{S}4}$                                            |
| 468.65       | 468.66         | $\text{H}_4[\text{V}_{10}\text{O}_{28}]^{2-}$                                            |
| 539.59       | 539.60         | $[\text{BaV}_{10}\text{O}_{27}]^{2-}$                                                    |
| 662.83       | 662.84         | $[\text{Ba}(\text{V}_{10}\text{O}_{26})_2]^{3-}$                                         |
| 668.50       | 668.51         | $\text{H}[\text{Ba}(\text{V}_{10}\text{O}_{26})(\text{V}_{10}\text{O}_{27})]^{3-}$       |
| 714.13       | 714.14         | $\text{Ba}_2[(\text{V}_{10}\text{O}_{26})(\text{V}_{10}\text{O}_{27})]^{3-}$             |
| 719.79       | 719.81         | $\text{HBa}_2[(\text{V}_{10}\text{O}_{27})_2]^{3-}$                                      |
| 766.92       | 766.93         | $\text{Ba}_2[(\text{V}_{10}\text{O}_{26})_2(\text{V}_{10}\text{O}_{27})]^{4-}$           |
| 805.39       | 805.41         | $\text{Ba}_3[(\text{V}_{10}\text{O}_{26})(\text{V}_{10}\text{O}_{27})_2]^{4-}$           |
| 1086.20      | 1086.22        | $[\text{H}_5\text{Ba}_3(\text{V}_{10}\text{O}_{27})_2(\text{V}_{10}\text{O}_{28})]^{3-}$ |
| 1098.20      | 1098.23        | $\text{H}_6\text{Ba}_2[(\text{V}_{10}\text{O}_{28})_2]^{2-}$                             |

4.2 ESI-MS measurements were performed on **compound 1** (ca.  $1 \times 10^{-4}$  M in MeOH) in negative (-ve) ion mode.

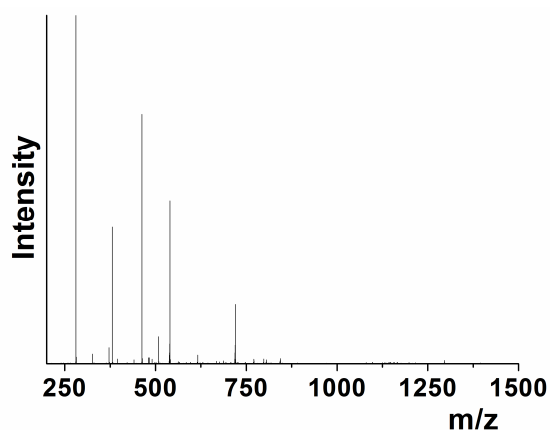

**Figure S 6** Negative mode high resolution ESI mass spectrum of of compound **1** ca.  $1 \times 10^{-5}$  M in Methanol.

**Table S 3** Peak assignments for ESI-MS Spectrum of compound **1** in MeOH.

| recorded m/z          | calculated m/z | peak assignment                                                                          |
|-----------------------|----------------|------------------------------------------------------------------------------------------|
| 280.79                | 280.79         | $[\text{V}_3\text{O}_8]^{1-}$                                                            |
| 380.72                | 380.73         | $\text{H}[\text{V}_4\text{O}_{11}]^{1- \text{S}4}$                                       |
| 462.65                | 462.65         | $[\text{V}_{10}\text{O}_{26}]^{2- \text{S}4}$                                            |
| 539.59 <sup>[a]</sup> | 539.60         | $[\text{BaV}_{10}\text{O}_{27}]^{2-}$                                                    |
| 616.55                | 616.55         | $[\text{Ba}_2\text{V}_{10}\text{O}_{28}]^{2-}$                                           |
| 644.50                | 644.52         | $[\text{V}_7\text{O}_{18}]^{1-}$                                                         |
| 719.80                | 719.81         | $\text{H}[\text{Ba}_2(\text{V}_{10}\text{O}_{27})_2]^{3-}$                               |
| 771.10                | 771.11         | $\text{HBa}_3[(\text{V}_{10}\text{O}_{27})(\text{V}_{10}\text{O}_{28})]^{3-}$            |
| 719.79                | 719.81         | $\text{HBa}_2[(\text{V}_{10}\text{O}_{27})_2]^{3-}$                                      |
| 766.92                | 766.93         | $\text{Ba}_2[(\text{V}_{10}\text{O}_{26})_2(\text{V}_{10}\text{O}_{27})]^{4-}$           |
| 805.39                | 805.41         | $\text{Ba}_3[(\text{V}_{10}\text{O}_{26})(\text{V}_{10}\text{O}_{27})_2]^{4-}$           |
| 809.90                | 809.91         | $\text{H}_2[\text{Ba}_3(\text{V}_{10}\text{O}_{27})_3]^{4-}$                             |
| 814.41                | 814.41         | $\text{H}_4[\text{Ba}_3(\text{V}_{10}\text{O}_{27})_2(\text{V}_{10}\text{O}_{28})]^{4-}$ |
| 843.87                | 843.88         | $[\text{Ba}_4(\text{V}_{10}\text{O}_{27})_3]^{4-}$                                       |
| 848.38                | 848.38         | $\text{H}_2[\text{Ba}_4(\text{V}_{10}\text{O}_{28})(\text{V}_{10}\text{O}_{27})_2]^{4-}$ |
| 852.88                | 852.89         | $\text{H}_4[\text{Ba}_4(\text{V}_{10}\text{O}_{28})_2(\text{V}_{10}\text{O}_{27})]^{4-}$ |

|         |         |                                                                                          |
|---------|---------|------------------------------------------------------------------------------------------|
| 891.14  | 891.15  | $\text{H}[\text{Ba}_5(\text{V}_{10}\text{O}_{27})_4]^{5-}$                               |
| 894.74  | 894.75  | $\text{H}_3[\text{Ba}_5(\text{V}_{10}\text{O}_{27})_3(\text{V}_{10}\text{O}_{28})]^{5-}$ |
| 901.96  | 901.95  | $\text{H}_7[\text{Ba}_5(\text{V}_{10}\text{O}_{28})_3(\text{V}_{10}\text{O}_{27})]^{5-}$ |
| 921.32  | 921.33  | $\text{H}[\text{Ba}_6(\text{V}_{10}\text{O}_{28})(\text{V}_{10}\text{O}_{27})_3]^{5-}$   |
| 1086.20 | 1086.22 | $[\text{H}_5\text{Ba}_3(\text{V}_{10}\text{O}_{27})_2(\text{V}_{10}\text{O}_{28})]^{3-}$ |
| 1098.20 | 1098.23 | $\text{H}_6\text{Ba}_2[(\text{V}_{10}\text{O}_{28})_2]^{2-}$                             |

4.3 CSI-MS (-35 °C) measurements were performed on **compound 1** (ca.  $1 \times 10^{-4}$  M in DMF/MeCN (1:4, v:v)) in negative (-ve) ion mode.

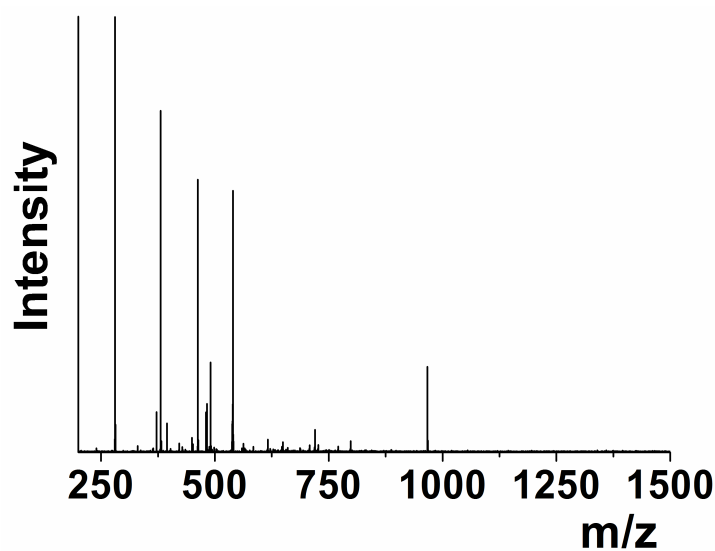

**Figure S 7** Negative mode high resolution CSI mass spectrum of compound **1** ca.  $1 \times 10^{-4}$  M in DMF/MeCN (1:4, v:v).

**Table S 4** Peak assignments for CSI-MS Spectrum of compound **1** in DMF/MeCN (1:4, v:v).

| recorded m/z         | calculated m/z | peak assignment                                                                        |
|----------------------|----------------|----------------------------------------------------------------------------------------|
| 462.65               | 462.65         | $[\text{V}_{10}\text{O}_{26}]^{2- \text{S}4}$                                          |
| 480.66               | 480.6          | $[\text{V}_{10}\text{O}_{28}]^{2-}$                                                    |
| 539.59 <sup>a]</sup> | 539.60         | $[\text{BaV}_{10}\text{O}_{27}]^{2-}$                                                  |
| 719.81               | 719.81         | $\text{H}[\text{Ba}_2(\text{V}_{10}\text{O}_{27})_2]^{3-}$                             |
| 725.81               | 725.81         | $\text{H}_3\text{Ba}_2[(\text{V}_{10}\text{O}_{28})(\text{V}_{10}\text{O}_{27})]^{3-}$ |

|         |         |                                                                                          |
|---------|---------|------------------------------------------------------------------------------------------|
| 731.81  | 731.81  | $\text{H}_5\text{Ba}_2[(\text{V}_{10}\text{O}_{28})_2]^{3-}$                             |
| 771.10  | 771.11  | $\text{HBa}_3[(\text{V}_{10}\text{O}_{27})(\text{V}_{10}\text{O}_{28})]^{3-}$            |
| 719.79  | 719.81  | $\text{HBa}_2[(\text{V}_{10}\text{O}_{27})_2]^{3-}$                                      |
| 805.41  | 805.41  | $\text{Ba}_3[(\text{V}_{10}\text{O}_{26})(\text{V}_{10}\text{O}_{27})_2]^{4-}$           |
| 809.90  | 809.91  | $\text{H}_2[\text{Ba}_3(\text{V}_{10}\text{O}_{27})_3]^{4-}$                             |
| 814.41  | 814.41  | $\text{H}_4[\text{Ba}_3(\text{V}_{10}\text{O}_{27})_2(\text{V}_{10}\text{O}_{28})]^{4-}$ |
| 818.91  | 818.92  | $\text{H}_6[\text{Ba}_3(\text{V}_{10}\text{O}_{28})_2(\text{V}_{10}\text{O}_{27})]^{4-}$ |
| 823.42  | 823.42  | $\text{H}_8[\text{Ba}_3(\text{V}_{10}\text{O}_{28})_3]^{4-}$                             |
| 878.38  | 878.38  | $\text{H}_{11}[\text{Ba}_4(\text{V}_{10}\text{O}_{28})_4]^{5-}$                          |
| 1098.23 | 1098.23 | $\text{H}_6\text{Ba}_2[(\text{V}_{10}\text{O}_{28})_2]^{2-}$                             |

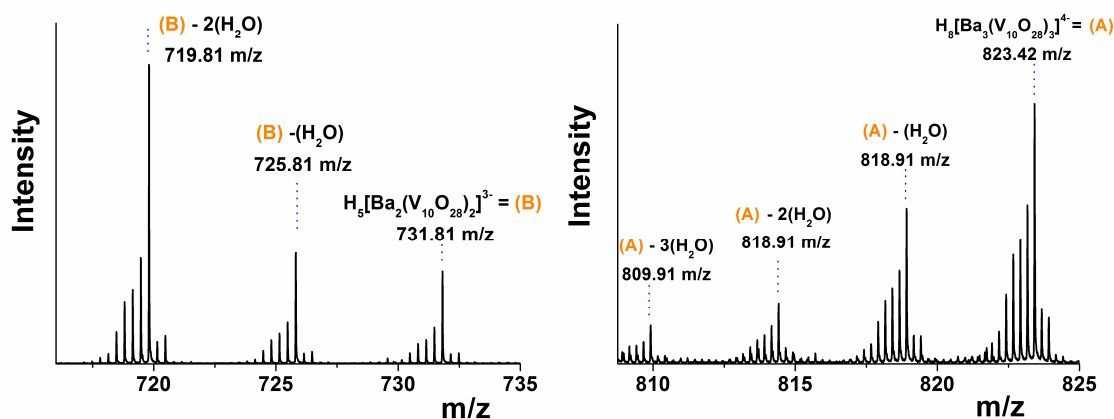

**Figure S 8** Left: Peak assignment for the threefold negatively charged series of  $\text{H}_5[\text{Ba}_2(\text{V}_{10}\text{O}_{28})_2]^{3-}$  (=B) and its fragment series with formal loss of one and two water molecules, respectively (mass region of  $m/z = \text{ca. } 721\text{-}734$ ). Right: Peak assignment for the fourfold negatively charged series of  $\text{H}_8[\text{Ba}_3(\text{V}_{10}\text{O}_{28})_3]^{4-}$  (=A) and its derivatives under the formal loss of one, two and three water molecules, respectively (mass region of  $m/z = \text{ca. } 809\text{-}825$ ).

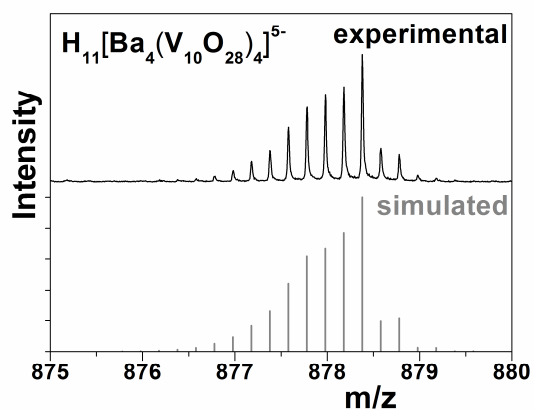

**Figure S 9** Comparison of the experimental and simulated signals for the largest Ba-devanadate fragment assigned. It is formally assigned to  $H_{11}[Ba_4(V_{10}O_{28})_4]^{5-}$  at  $m/z = 878.38$ .

4.4 CSI-MS (-35 °C) measurements were performed on compound **2** (ca.  $1 \times 10^{-4}$  M in DMF/MeCN (1:4, v:v)) in negative (-ve) ion mode.

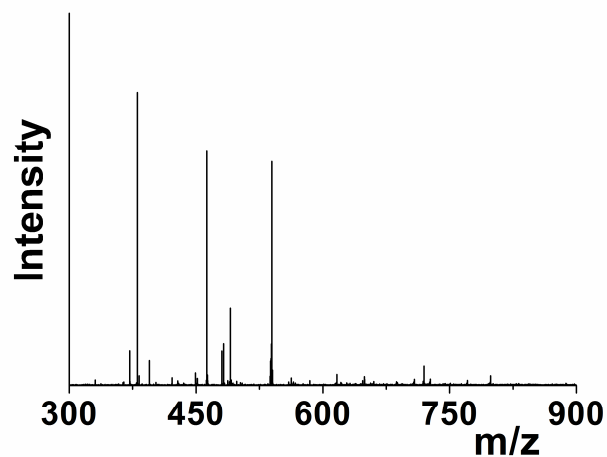

**Figure S 10** Negative mode high resolution CSI mass spectrum of compound **2** ca.  $1 \times 10^{-4}$  M in DMF/MeCN (1:4, v:v).

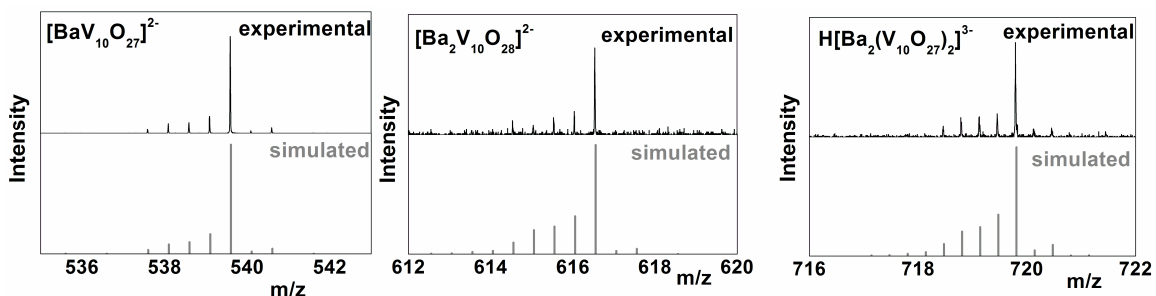

**Figure S 11** Comparison of the experimental and simulated signals for the largest Ba-devanadate fragment, which could be detected via CSI-MS. The peak at  $m/z = 539.60$  was assigned to  $[\text{Ba}(\text{V}_{10}\text{O}_{27})]^{2-}$ , the peak at  $m/z = 616.55$  was assigned to at  $[\text{Ba}_2(\text{V}_{10}\text{O}_{28})]^{2-}$ , the peak at  $m/z = 719.81$  was assigned to at  $\text{H}[\text{Ba}_2(\text{V}_{10}\text{O}_{27})_2]^{3-}$ .

**Table S 5** Peak assignments for CSI-MS Spectrum of compound **2** ca.  $1 \times 10^{-4}$  M in DMF/MeCN (1:4, v:v).

| recorded m/z | calculated m/z | peak assignment                                            |
|--------------|----------------|------------------------------------------------------------|
| 280.79       | 280.79         | $[\text{V}_6\text{O}_{16}]^{2-\text{S}4}$                  |
| 462.65       | 462.65         | $[\text{V}_{10}\text{O}_{26}]^{2-\text{S}4}$               |
| 380.72       | 380.72         | $\text{H}[\text{V}_4\text{O}_{11}]^{1-\text{S}4}$          |
| 480.66       | 480.66         | $\text{H}_4[\text{V}_{10}\text{O}_{28}]^{2-}$              |
| 539.60       | 539.60         | $[\text{BaV}_{10}\text{O}_{27}]^{2-}$                      |
| 616.55       | 616.55         | $[\text{Ba}_2\text{V}_{10}\text{O}_{28}]^{2-}$             |
| 719.81       | 719.81         | $\text{H}[\text{Ba}_2(\text{V}_{10}\text{O}_{27})_2]^{3-}$ |



## 5. Thermogravimetric analysis

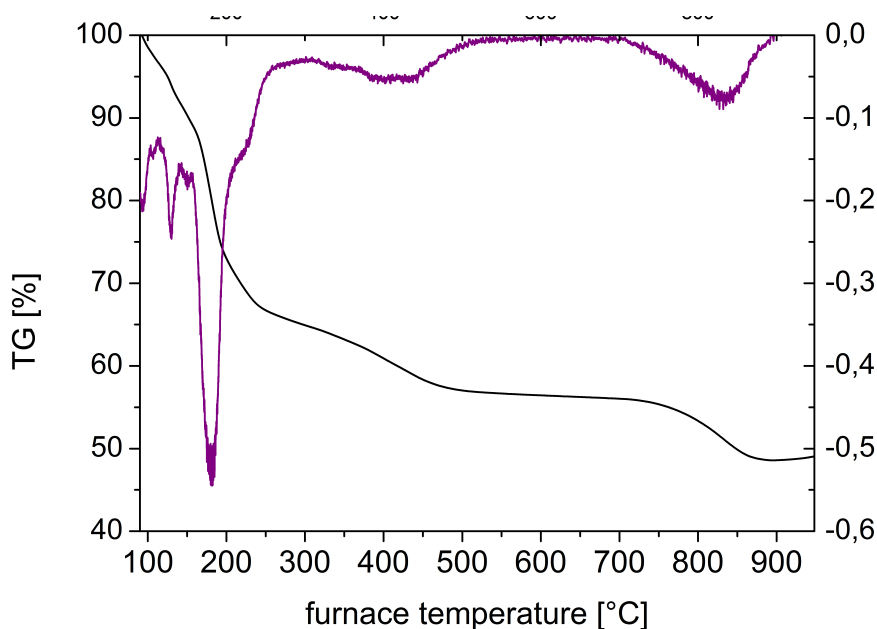

**Figure S 12** Thermogravimetric analysis of compound **1**, indicating a first weight loss step (25 – 307.7 °C) corresponding to eight water molecules and 20 NMP molecules (11 solvent molecules and 9 ligand molecules) (observed: 35.31 wt.-%; calc: 35.20 wt.-%); the second weight loss step (307.7 – 574.5 °C) corresponds to the loss of five ligand NMP molecules (observed: 8.14 wt.-%, calc: 8.20 wt.-%). Above 700 °C the cluster anion decomposes and the third weight loss step can be assigned to three Ba(OH)<sub>2</sub> molecules (white precipitate observed at the exhaust of the TGA instrument), whereby the protons from the cluster might serve as the proton source (observed: 7.96 wt.-%; calc: 8.49 wt.-%).

## 6. Literature references cited in Supporting Information

- S1 G. M. Sheldrick, *Acta Crystallogr.*, **2008**, A64, 112.
- S2 L. J. Farrugia, *J. Appl. Cryst.*, **1999**, 32, 837.
- S3 R. H. Blessing, *Acta Crystallogr. A*, **1995**, 51, 33.
- S4 T. Glone, J. Thiel, C. Streb, D.-L. Long, L. Cronin, *Chem. Commun.*, **2012**, 48, 359.
